# Supplementary material for: Mask-painting symmetrical micro-supercapacitors based on scalable, pore size adjustable, N-doped hierarchical porous carbon
Source: Royal Society of Chemistry journal article supplement (doi:10.1039/d1ta01194d), 2021-01-01
Supplement: d1ta01194d1.pdf [file d1ta01194d1.pdf]

**Supplementary information**

**Mask-painting symmetrical micro-supercapacitors based on scalable, pore size adjustable, N-doped hierarchical porous carbon**

*Shijin Zhu, Michael Göbel, Petr Formanek, Frank Simon,  
Michael Sommer<sup>\*</sup>, Soumyadip Choudhury<sup>†\*</sup>*

Shijin Zhu, Prof. Dr. Michael Sommer, Dr. Soumyadip. Choudhury  
Polymer chemistry, Institute for Chemistry and Center for Materials, Architectures  
and Integration of Nanomembranes (MAIN), Chemnitz University of Technology,  
09107 Chemnitz, Germany.

Michael Göbel, Dr. Petr. Formanek, Dr. Frank Simon  
Leibniz-Institut für Polymerforschung Dresden e.V., Hohe Straße 6, 01069 Dresden,  
Germany.

† present address:

Rubber Technology Centre, Indian Institute of Technology Kharagpur, 721302,  
Kharagpur, West Bengal, India

\* [soumyadip.choudhury@chemie.tu-chemnitz.de](mailto:soumyadip.choudhury@chemie.tu-chemnitz.de), [Michael.sommer@chemie.tu-chemnitz.de](mailto:Michael.sommer@chemie.tu-chemnitz.de)

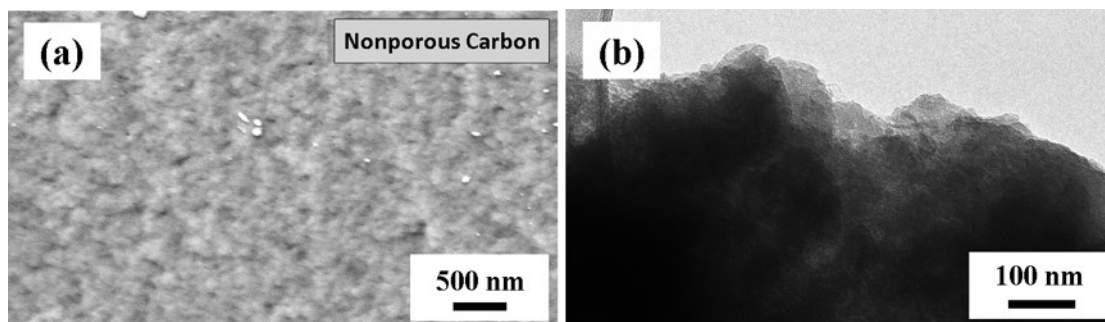

**Fig. S1** (a)SEM image and (b) TEM image of nonporous carbon prepared from poly(acrylonitrile) (PAN) by air drying and carbonization.

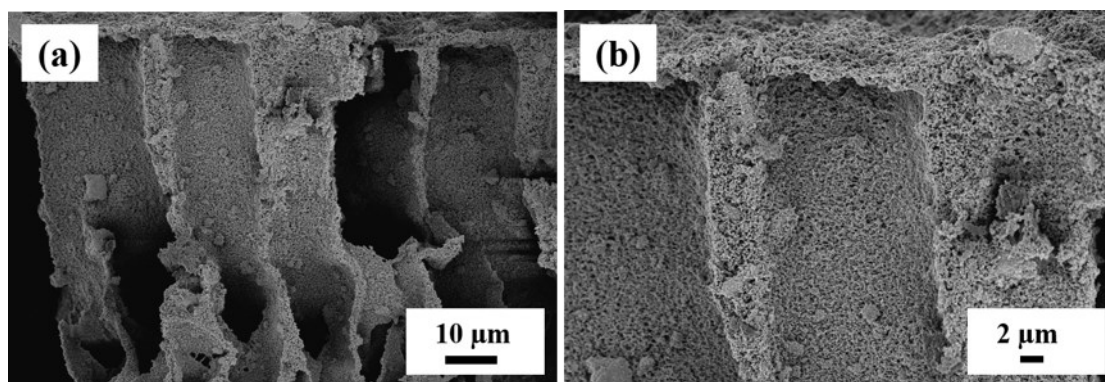

**Fig. S2** SEM images porous carbon prepared from poly(acrylonitrile) (PAN) by a phase inversion method (a), and carbonization (PI carbon) (b).

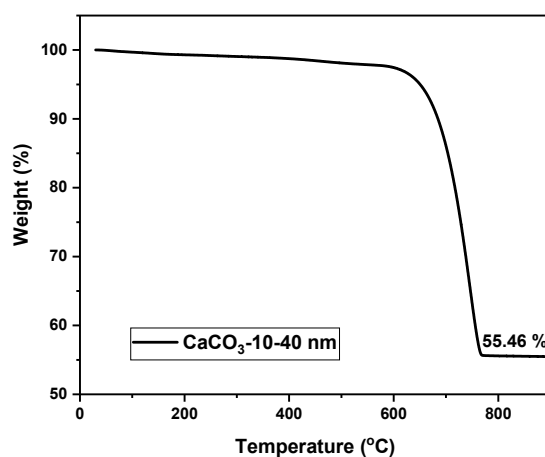

**Fig. S3** Thermogravimetric analysis of nano- $\text{CaCO}_3$ .

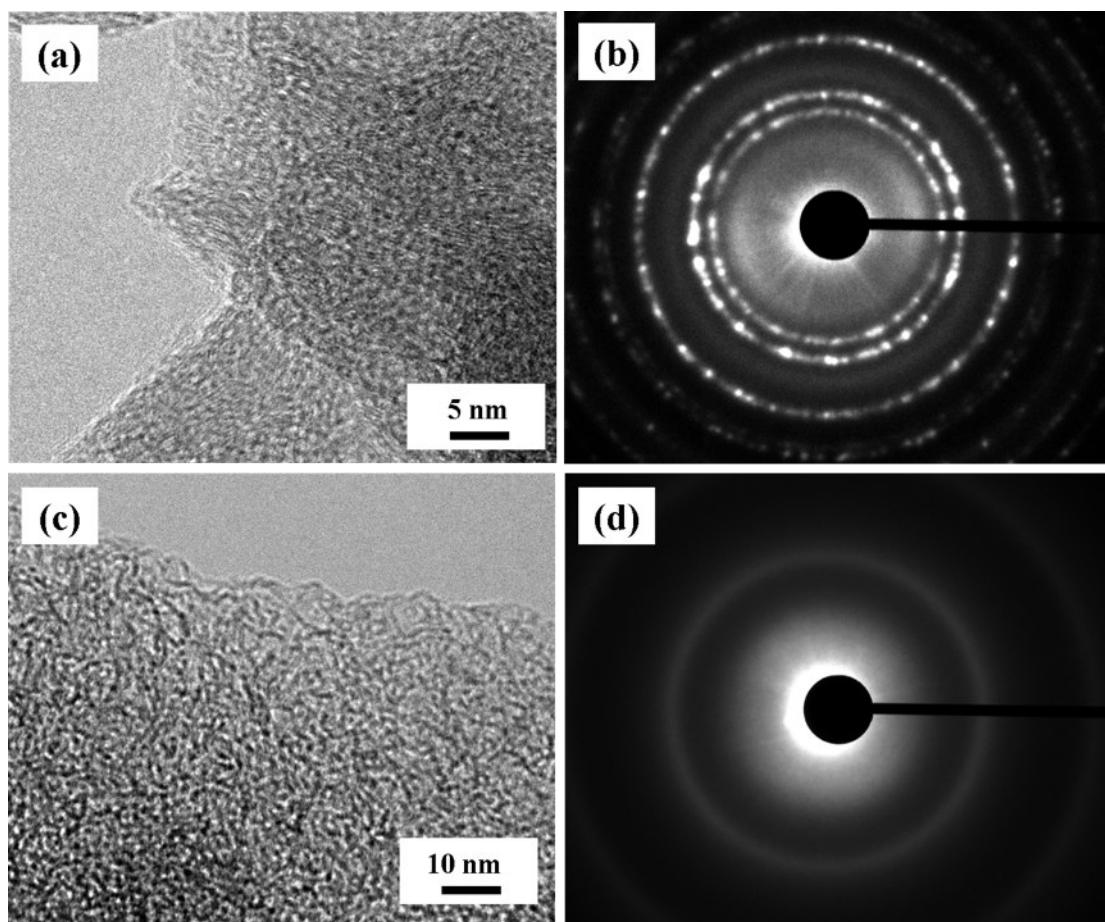

**Fig. S4** TEM image and selected area electron diffraction (SAED) of (a, b) PIC carbon; (c, d) PICK carbon.

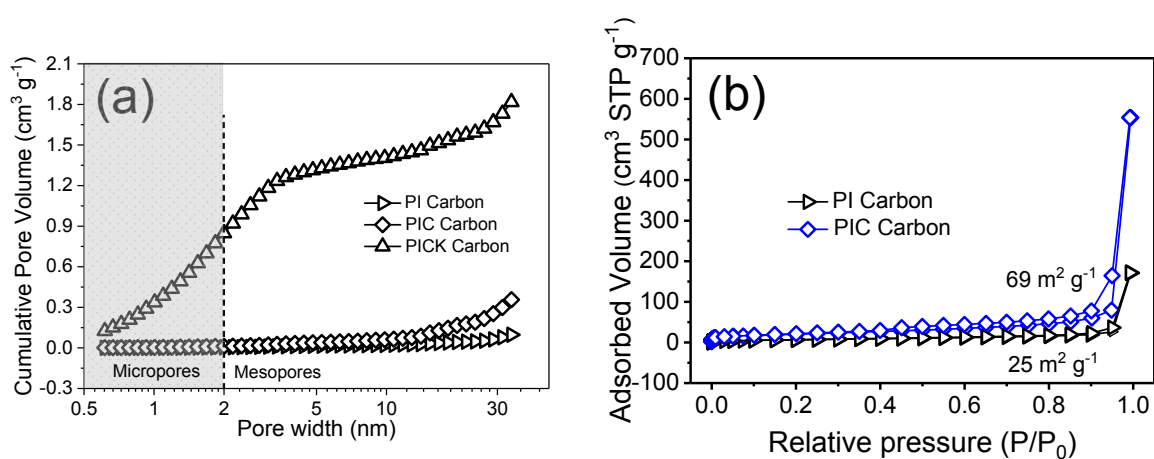

**Fig. S5** (a) Cumulative pore volume of as prepared porous carbon; (b) Nitrogen adsorption-desorption isotherms of PI and PIC carbon

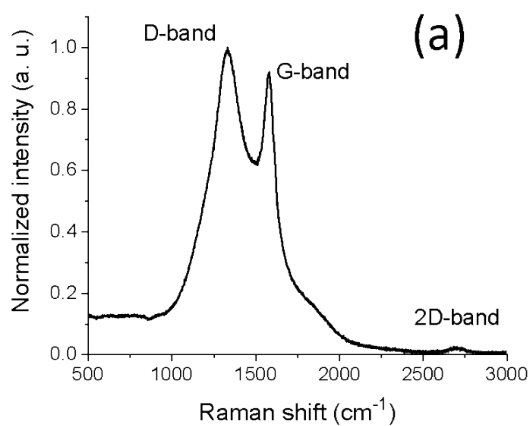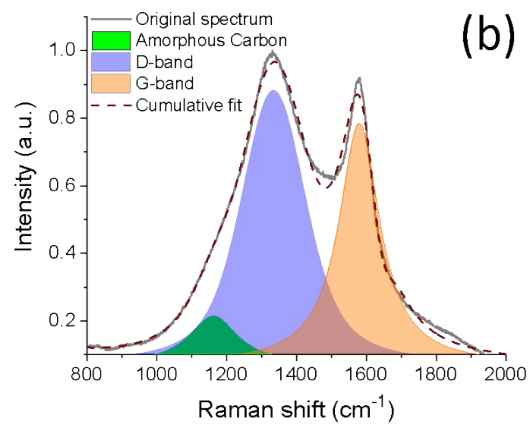

**Fig. S6** (a, b) Raman spectra of PICK carbon.

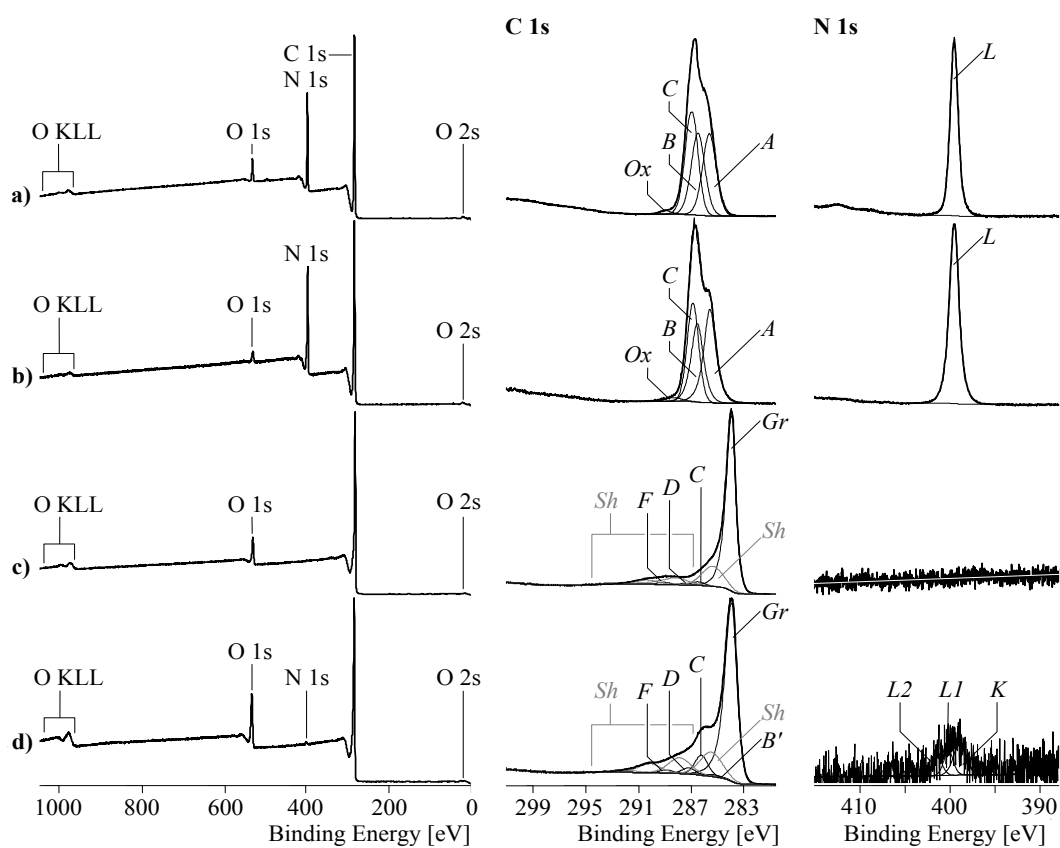

**Fig. S7** XPS wide-scan (left column), C 1s (middle column), and N 1s (right column) high-resolution element spectra recorded from (a) pristine PAN (b) PAN films, (c) YP-80F and (d) PICK carbon.

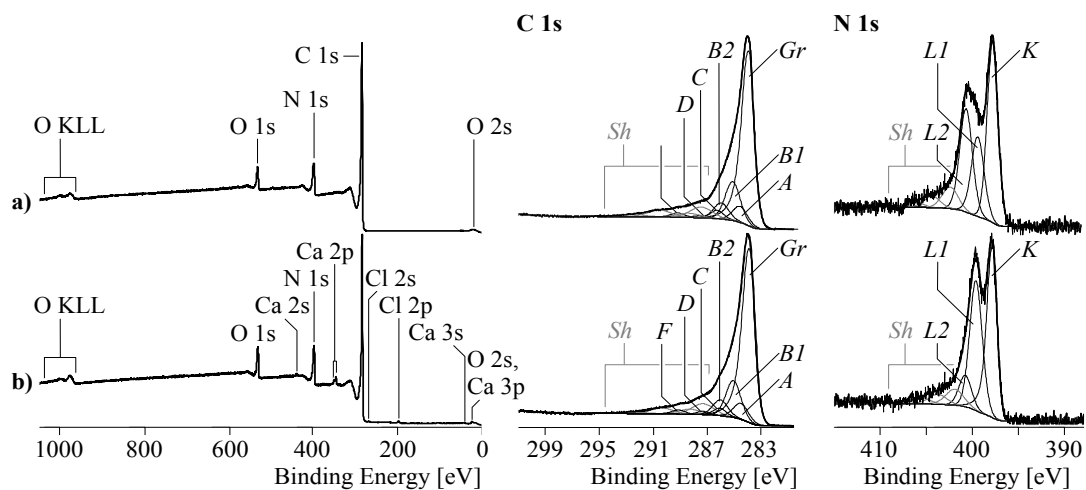

**Fig. S8** XPS wide-scan (left column), C 1s (middle column), and N 1s (right column) high-resolution element spectra recorded from (a) PI carbon and (b) PIC carbon.

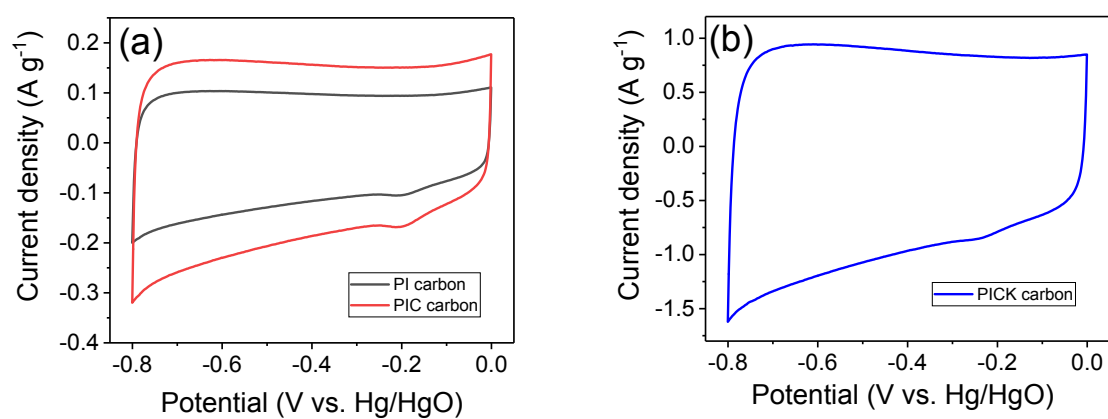

**Fig. S9** (a) CV curves of PI and PIC carbon at a scan rate of 5 mV s<sup>-1</sup> in 6.0 M KOH. (b) CV curves of PICK carbon at a scan rate of 5 mV s<sup>-1</sup> in 6.0 M KOH.

**Table S1** Synthesis parameters, Surface area, Pore volume and Capacitance of as prepared carbons.

| Sample | Mass ratio<br>(PAN: CaCO <sub>3</sub> ) | Mass ratio<br>(PIC: KOH) | S <sub>BET</sub><br>(m <sup>2</sup> g <sup>-1</sup> ) | Pore Volume<br>(CC g <sup>-1</sup> ) | Capacitance<br>(F g <sup>-1</sup> ) |
|--------|-----------------------------------------|--------------------------|-------------------------------------------------------|--------------------------------------|-------------------------------------|
| PI     | -                                       | -                        | 25                                                    | 0.05                                 | 12.8                                |
| PIC    | 1: 1                                    | -                        | 69                                                    | 0.17                                 | 28.1                                |
| PICK   | 1: 1                                    | 1: 3                     | 2315                                                  | 1.72                                 | 231.3                               |
| PICK-1 | 1: 1                                    | 1: 1                     | 1120                                                  | 0.74                                 | 113.2                               |
| PICK-2 | 1: 1                                    | 1: 2                     | 1414                                                  | 1.03                                 | 138.6                               |
| PICK-3 | 2: 1                                    | 1: 2                     | 1216                                                  | 0.89                                 | 124.6                               |
| PICK-4 | 2: 1                                    | 1: 3                     | 1506                                                  | 1.09                                 | 156.4                               |
| PICK-5 | 3: 1                                    | 1: 3                     | 1469                                                  | 1.04                                 | 142.5                               |



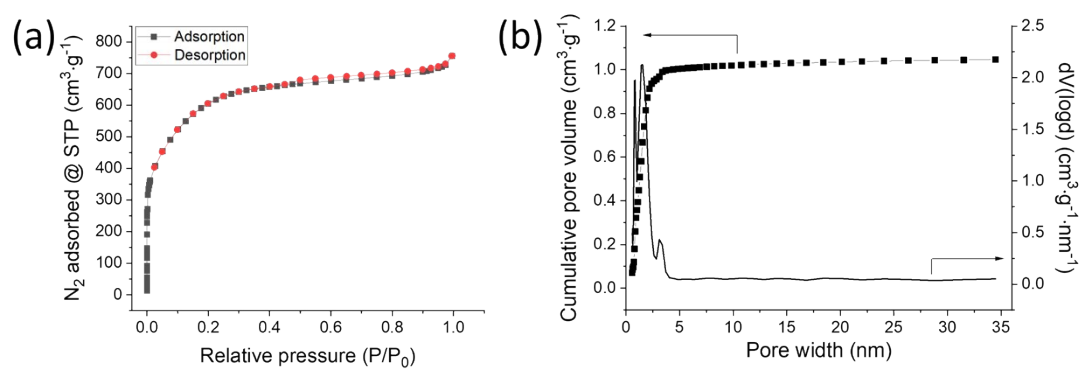

**Fig. S10** (a) Nitrogen adsorption-desorption isotherms and (b) pore size distribution and cumulative pore volume of YP-80F.

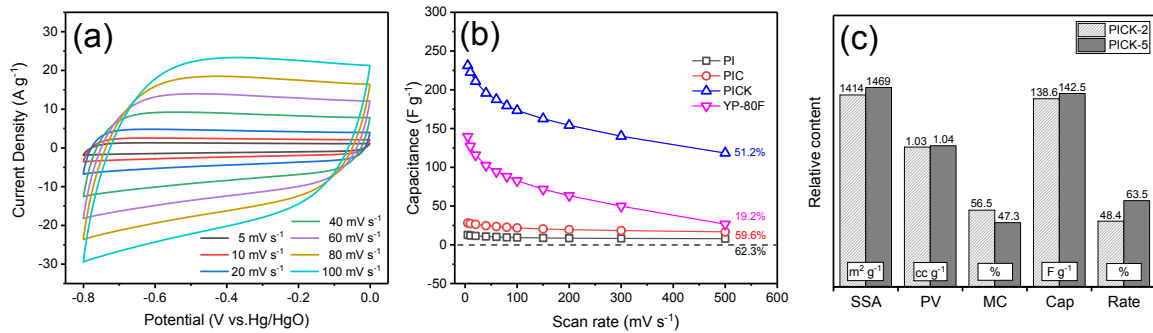

**Fig. S11** (a) CV curves of PICK carbon; (b) Rate capability of as prepared porous carbon; (c) Comparison of two kinds of PICK on structure and electrochemical properties (SSA: Specific Surface Area; PV: Pore Volume; MC: Micropores content; Cap: capacitance; Rate: Rate capability)

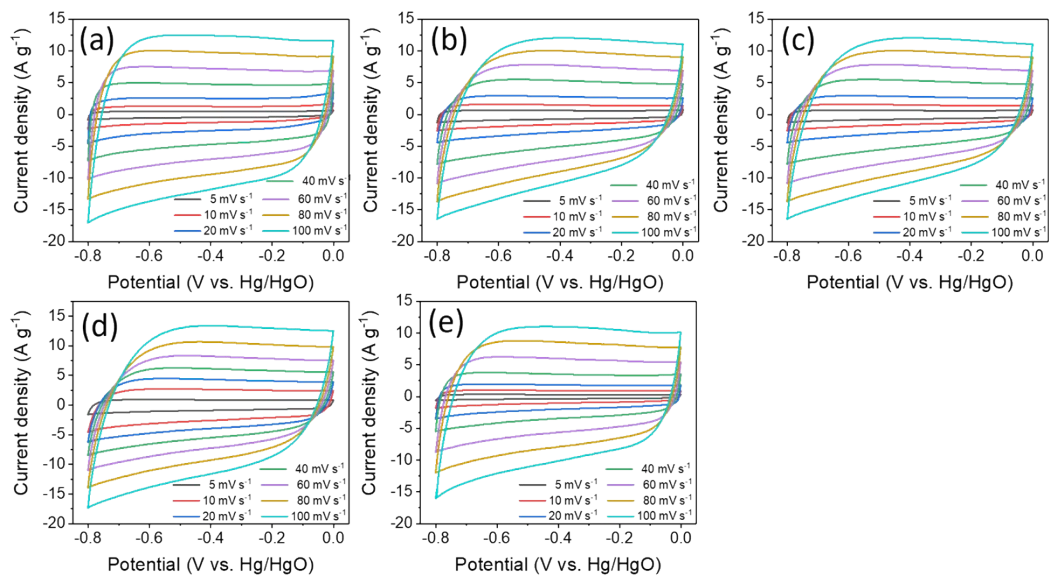

**Fig. S12** CV curves of (a) PICK-1, (b) PICK-2, (c) PICK-3, (d) PICK-4, (e) PICK-5 in 1.0 M Na<sub>2</sub>SO<sub>4</sub>.

**Table S2** Details of XPS results and capacitance of PICK-1, PICK-2, PICK-3, PICK-4 and PICK-5.

| Sample | Peak | Position BE(eV) | Atomic Conc (%) | Mass Conc (%) | Capacitance (F g <sup>-1</sup> ) |
|--------|------|-----------------|-----------------|---------------|----------------------------------|
| PICK-1 | C 1s | 284.2           | 80.22           | 72.54         | 113.2                            |
|        | N 1s | 399.25          | 1.71            | 1.81          |                                  |
|        | O 1s | 533.26          | 14.08           | 16.96         |                                  |
| PICK-2 | C 1s | 284.2           | 80.22           | 72.43         | 138.6                            |
|        | N 1s | 399.65          | 1.56            | 1.64          |                                  |
|        | O 1s | 532.78          | 14.02           | 16.87         |                                  |
| PICK-3 | C 1s | 284.2           | 80.3            | 70.2          | 124.6                            |
|        | N 1s | 399.89          | 1.5             | 1.5           |                                  |
|        | O 1s | 532.82          | 11.37           | 12.47         |                                  |
| PICK-4 | C 1s | 284.2           | 87.93           | 83.94         | 156.4                            |
|        | N 1s | 399.78          | 0.52            | 0.58          |                                  |
|        | O 1s | 532.37          | 10.76           | 13.68         |                                  |
| PICK-5 | C 1s | 284.59          | 86.93           | 80.47         | 142.5                            |
|        | N 1s | 399.84          | 0.54            | 0.58          |                                  |
|        | O 1s | 532.16          | 9.63            | 11.88         |                                  |

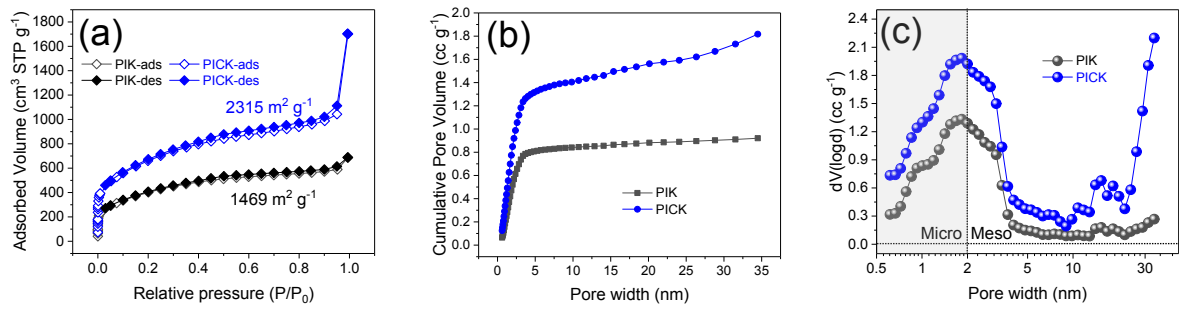

**Fig. S13** (a) Nitrogen adsorption-desorption isotherms, (b) pore volume and (c) pore size distribution of PIK and PICK carbons.

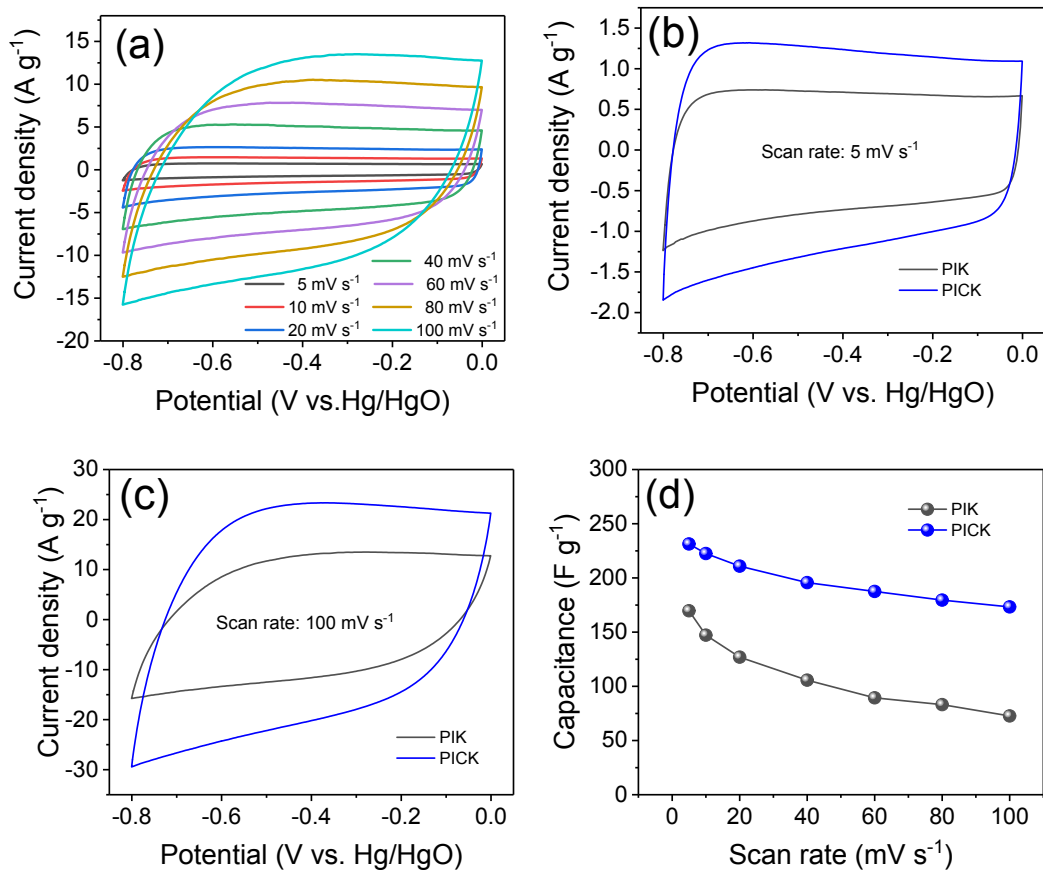

**Fig. S14** (a) CV curves of PIK carbon at different scan rate; (b) CV curves of PIK carbon and PICK carbon at the scan rate of 5 mV s<sup>-1</sup>; (c) CV curves of PIK carbon and PICK carbon at the scan rate of 100 mV s<sup>-1</sup>; (d) rate capability of PIK carbon and PICK carbon.

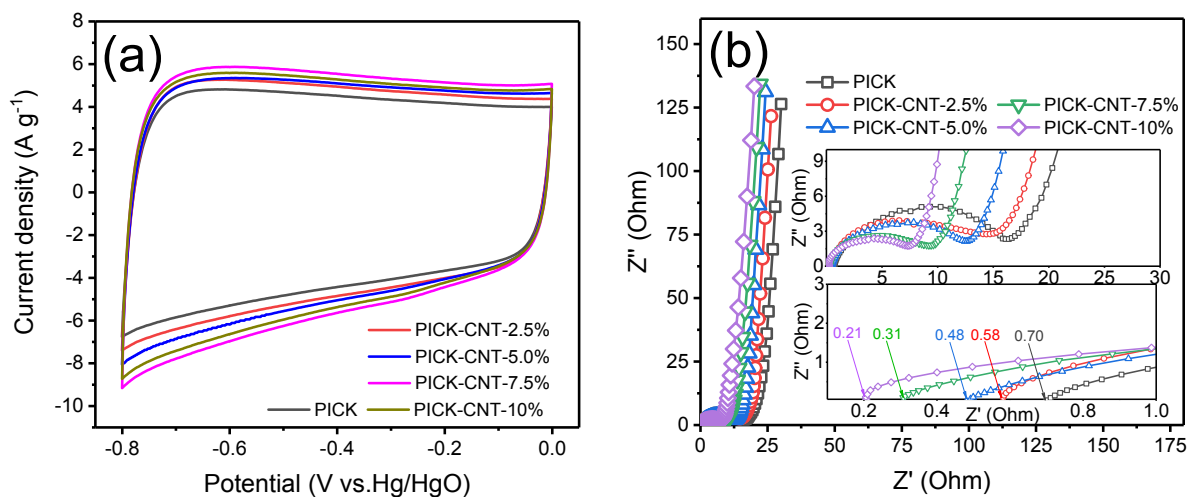

**Fig. S15** (a) CV curves of a series of PICK-CNT electrode at a scan rate of 20 mV s<sup>-1</sup>. (b) Electrochemical impedance spectrum at open circuit potential range from 0.01 Hz to 100 kHz with insert showing the high frequency region.

Table 3 Comparison on the electrochemical performance of some PAN based carbon.

| Electrode/<br>precursor | $S_{\text{BET}}$<br>( $\text{m}^2 \text{g}^{-1}$ ) | Scan rate/<br>Current density          | electrolyte                                                   | Capacitance<br>( $\text{F g}^{-1}$ ) | Cycling stability     | Reference                                      |
|-------------------------|----------------------------------------------------|----------------------------------------|---------------------------------------------------------------|--------------------------------------|-----------------------|------------------------------------------------|
| PAN                     | 1886                                               | 1.0 A $\text{g}^{-1}$                  | 1.0 M $\text{Na}_2\text{SO}_4$                                | 103.01                               | ~92% (3,000)          | Compos. Part B-Eng., <b>2019</b> , 161, 10.    |
| PAN-carbon              | 2370                                               | 10 mV $\text{s}^{-1}$                  | Pyr14TFSL:PC:EC (3;3;2)                                       | 128                                  | 75% (1,000)           | Nanotechnology, <b>2019</b> , 30, 355402.      |
| PAN/PMMA                | -                                                  | 0.5 A $\text{g}^{-1}$                  | 6.0 M KOH                                                     | 140.8                                | 95.4% (10,000)        | J. Mater. Sci., <b>2018</b> , 53, 9721.        |
| LCNFs/PANI/N-9          | 483                                                | 1.0 A $\text{g}^{-1}$                  | 1.0 M $\text{H}_2\text{SO}_4$                                 | 199.5                                | 82% (1,000)           | Ionics, <b>2020</b> , 26, 465.                 |
| rGOPKS/PAN              | 203                                                | 2.0 A $\text{g}^{-1}$                  | 4.0 M KOH                                                     | 203                                  | 90% (5,000)           | RSC Adv., <b>2021</b> , 11, 11233.             |
| PAN                     | 1986                                               | 0.25 A $\text{g}^{-1}$                 | -                                                             | 210                                  | 86.8% (3,000)         | Electrochem. Commu., <b>2018</b> , 96, 98.     |
| NDP-ACMs                | 613.8                                              | 10 mV $\text{s}^{-1}$                  | 1.0 M $\text{H}_2\text{SO}_4$                                 | 216                                  | 108% (3,000)          | Sci. Rep., <b>2017</b> , 7, 1.                 |
| NDP-CMs                 | 840                                                | 2.5 A $\text{g}^{-1}$                  | 1.0 M $\text{H}_2\text{SO}_4$                                 | 246                                  | 110% (3,000)          | Carbon, <b>2019</b> , 143, 776.                |
| PAN                     | 1256.2                                             | 10 mV $\text{s}^{-1}$                  | [BMIM]BF <sub>4</sub> <sup>-</sup>                            | 248.3                                | 99.80%                | Electrochim. Acta, <b>2018</b> , 282, 97.      |
| PAN/POSS                | 335.38                                             | 5 mV $\text{s}^{-1}$                   | -                                                             | 257.7                                | -                     | Mater. Design, <b>2018</b> , 139, 72.          |
| PAN                     | 852                                                | 0.2 A $\text{g}^{-1}$                  | 1.0 M $\text{ZnSO}_4$                                         | 261.5                                | -                     | Batteries & Supercaps, <b>2021</b> , 680.      |
| ACNFs                   | 2439                                               | 1.0 A $\text{g}^{-1}$                  | 6.0 M KOH                                                     | 267.32                               | 96.7% (5,000)         | J. Power Sources, <b>2019</b> , 437, 226937.   |
| PMC                     | 1600                                               | 0.2 A $\text{g}^{-1}$                  | 1.0 M $\text{H}_2\text{SO}_4$                                 | 270                                  | 100% (5,000)          | RSC Adv., <b>2017</b> , 7, 43172.              |
| CNF-3                   | 51.2                                               | 0.5 A $\text{g}^{-1}$                  | 6.0 M KOH                                                     | 272.05                               | 92% (1,000)           | Mater. Res. Express, <b>2019</b> , 6, 125077.  |
| PAN/CA                  | 1355                                               | 0.1 A $\text{g}^{-1}$                  | 6.0 M KOH                                                     | 280                                  | 96.8% (2,000)         | J. Mater. Sci. <b>2018</b> , 53, 4527.         |
| <b>PICK-CNTs</b>        | <b>2315</b>                                        | <b>5 mV <math>\text{s}^{-1}</math></b> | <b>1.0 M <math>\text{Na}_2\text{SO}_4</math></b>              | <b>286.8</b>                         | <b>98.2% (20,000)</b> | <b>This work</b>                               |
| PAN                     | 3066                                               | 0.5 A $\text{g}^{-1}$                  | 2.0 M KOH                                                     | 290                                  | 96% (3,000)           | J. Mater. Chem. A, <b>2018</b> , 6, 6891.      |
| FSCs                    | 763.8                                              | 1 mA $\text{cm}^{-2}$                  | 6.0 M KOH                                                     | 294.7                                | 99.1 (10,000)         | Chem. Eng. J., <b>2019</b> , 364, 70.          |
| PAN                     | 2146                                               | 1.0 A $\text{g}^{-1}$                  | 6.0 M KOH                                                     | 302                                  | 86% (1,000)           | RSC Adv., <b>2018</b> , 8, 29767.              |
| PAN                     | 3292.3                                             | 0.5 A $\text{g}^{-1}$                  | 6.0 M KOH                                                     | 331                                  | 89.5% (10,000)        | Chem. Eng. J., <b>2018</b> , 362, 600.         |
| PAN-800-1               | 2374                                               | 0.5 A $\text{g}^{-1}$                  | 1.0 M $\text{Na}_2\text{SO}_4$ /1.0 M $\text{H}_2\text{SO}_4$ | 390                                  | 95.5% (10,000)        | ACS Appl. Mater. Inter. <b>2020</b> , 12, 50.  |
| PS/PAN                  | 955                                                | 0.5 A $\text{g}^{-1}$                  | 6.0 M KOH                                                     | 438.5                                | 75.5% (10,000)        | ACS Appl. Energy Mater. <b>2019</b> , 2, 4402. |
| PPC                     | 3751                                               | 0.5 A $\text{g}^{-1}$                  | 1.0 M $\text{Na}_2\text{SO}_4$                                | 448                                  | 96.5% (10,000)        | Carbon, <b>2019</b> , 152, 120-127.            |



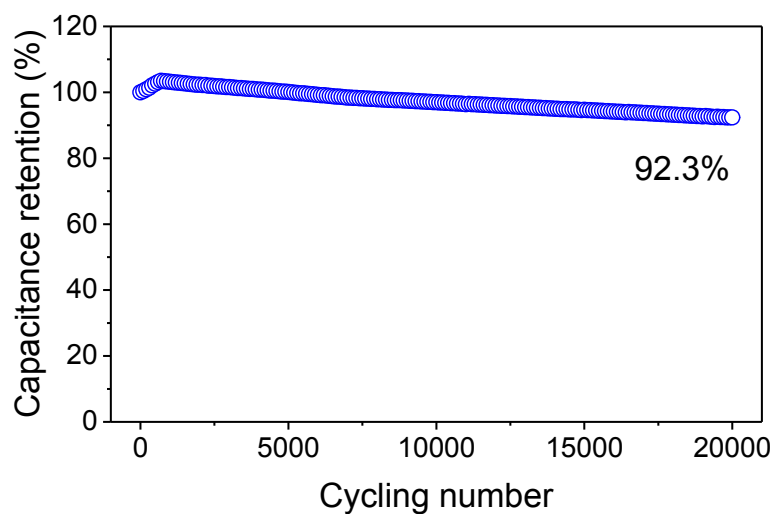

**Fig. S16** Cycling stability of pure PICK carbon at a scan rate of  $20 \text{ mV s}^{-1}$ .

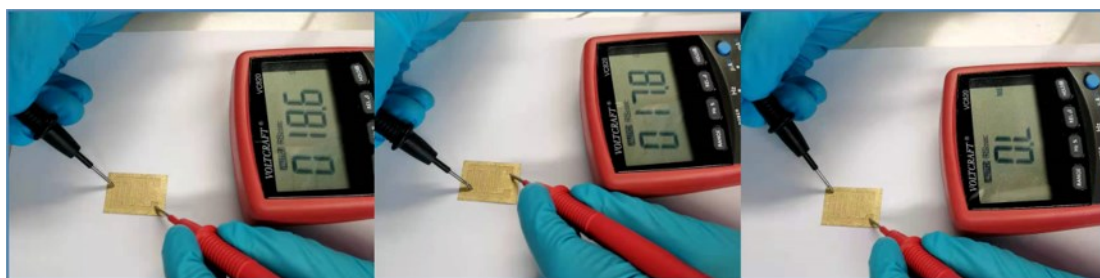

**Fig. S17** Resistance testing of the device before active materials painting

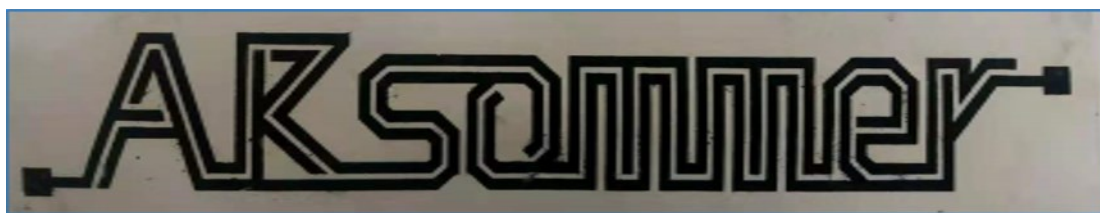

**Fig. S18** Image of MSC with logo “AK Sommer”.
